# Supplementary material for: ZSCAN5B and primate-specific paralogs bind RNA polymerase III genes and extra-TFIIIC (ETC) sites to modulate mitotic progression
Source: PubMed Central journal article supplement (PMC5340127; doi:10.18632/oncotarget.12508), 2016-10-06
Supplement: oncotarget-07-72571-s001.pdf [file oncotarget-07-72571-s001.pdf]

## ZSCAN5B and primate-specific paralogs bind RNA polymerase III genes and extra-TFIIIC (ETC) sites to modulate mitotic progression

### Supplementary Material

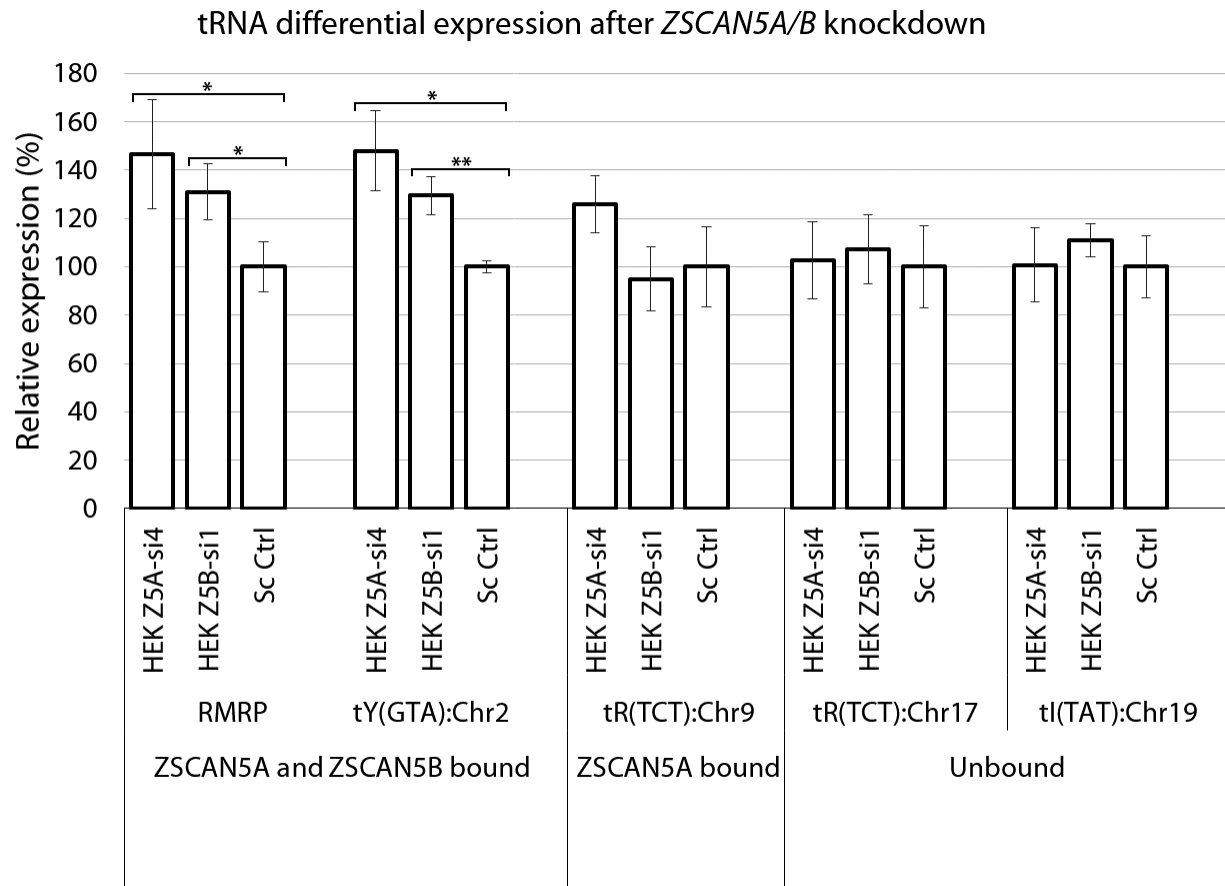

### Supplementary Figure 1: Differential expression of ZSCAN5-bound RMRP and tRNAs

qRT-PCR was done to measure the differential expression of gene loci that are bound and unbound by ZSCAN5A and ZSCAN5B after ablation of each gene by siRNA treatments in HEK-293 cells. Error bars correspond to the standard deviations between experimental triplicates. *P*-values to evaluate the significance of the expression differences were calculated from triplicate experiments using one-way ANOVA (\*: $P \leq 0.05$ , \*\*:  $P \leq 0.01$ ).
